# Supplementary material for: Canine Circovirus in Foxes from Northern Italy: Where Did It All Begin?
Source: MDPI journal article supplement (doi:10.3390/pathogens10081002), 2021-08-09
Supplement: s1 [file s1]

**Table S1.** Summary of canineCV population parameters estimated using different combinations of population dynamics, molecular clock calibration and type. Time to the most recent common ancestor (in years), evolutionary rates (substitution/site/year) and marginal likelihood estimation results (estimated using Path Sampling (PS) and Stepping Stone (SS) methods) are reported.

| Calibration            | Clock             | Population dynamics | tMRCA                             | Evolutionary rate                                                          | PS         | SS         |
|------------------------|-------------------|---------------------|-----------------------------------|----------------------------------------------------------------------------|------------|------------|
| Inner Node Calibration | Strict            | Constant            | 44037.89[95HPD:29026.41-58171.24] | $4.06 \cdot 10^{-6}$ [95HPD: $2.08 \cdot 10^{-6}$ - $5.54 \cdot 10^{-6}$ ] | -24209,147 | -24209,314 |
|                        |                   | Skyline             | 44205.96[95HPD:30179.42-59729.17] | $4.03 \cdot 10^{-6}$ [95HPD: $2.77 \cdot 10^{-6}$ - $4.49 \cdot 10^{-6}$ ] | -24199,822 | -24203522  |
|                        | Relaxed LogNormal | Constant            | 84252.54[95HPD:38875.07-137000]   | $2.911 \cdot 10^{-6}$ [95HPD: $1.50 \cdot 10^{-6}$ - $4.5 \cdot 10^{-6}$ ] | -23978,267 | -23983,544 |
|                        |                   | Skyline             | 56615.81[95HPD:37288.85-76060.77] | $3.75 \cdot 10^{-6}$ [95HPD: $2.39 \cdot 10^{-6}$ - $5.31 \cdot 10^{-6}$ ] | -23976,57  | -23977,122 |
| Tip date onlyu         | Strict            | Constant            | 187.12[95HPD:112.12-209.51]       | $5.67 \cdot 10^{-3}$ [95HPD: $1.88 \cdot 10^{-3}$ - $3.21 \cdot 10^{-3}$ ] | -24208,941 | -24208,276 |
|                        |                   | Skyline             | 212.14[95HPD:156.82-268.77]       | $8.52 \cdot 10^{-4}$ [95HPD: $6.33 \cdot 10^{-4}$ - $1.08 \cdot 10^{-3}$ ] | -24184,036 | -24186,849 |
|                        | Relaxed LogNormal | Constant            | 150.11[95HPD:128.17-202.49]       | $2.53 \cdot 10^{-3}$ [95HPD: $1.39 \cdot 10^{-3}$ - $3.77 \cdot 10^{-3}$ ] | -23961,061 | -23963,263 |
|                        |                   | Skyline             | 163.03[95HPD:118.58-215.45]       | $1.21 \cdot 10^{-3}$ [95HPD: $8.80 \cdot 10^{-4}$ - $1.56 \cdot 10^{-3}$ ] | -23953,934 | -23956,166 |

**Table S2.** Summary table of metadata available for the samples included in the present study.

| SampleID | Municipality     | Forest station    | CanineCV | Sex    | Age Category | Collection date |
|----------|------------------|-------------------|----------|--------|--------------|-----------------|
| FoxVa_1  | Brissogne        | Nus               | Neg.     | Female | Adult        | 2009/2010       |
| FoxVa_2  | Charvensod       | Aosta             | Neg.     | Female | Adult        | 2009/2010       |
| FoxVa_3  | Quart            | Nus               | Neg.     | Male   | Adult        | 2009/2010       |
| FoxVa_4  | Nus              | Nus               | Neg.     | -      | -            | 2009/2010       |
| FoxVa_5  | Saint-Nicolas    | Arvier            | Neg.     | Female | Adult        | 2009/2010       |
| FoxVa_6  | Saint-Nicolas    | Arvier            | Neg.     | Male   | Adult        | 2009/2010       |
| FoxVa_7  | Torgnon          | Antey-Saint-André | Neg.     | Male   | Adult        | 2009/2010       |
| FoxVa_8  | Doues            | Valpelline        | Neg.     | Male   | Adult        | 2009/2010       |
| FoxVa_9  | Cogne            | Aymavilles        | Neg.     | Male   | Adult        | 2009/2010       |
| FoxVa_10 | Courmayeur       | Pré-Saint-Didier  | Neg.     | Female | Juvenile     | 2009/2010       |
| FoxVa_11 | Châtillon        | Châtillon         | Neg.     | Male   | Adult        | 2009/2010       |
| FoxVa_12 | Sarre            | Aosta             | Neg.     | Female | Adult        | 2009/2010       |
| FoxVa_13 | Avisé            | Arvier            | Neg.     | Male   | Adult        | 2009/2010       |
| FoxVa_14 | Saint-Christophe | Aosta             | Neg.     | Female | Adult        | 2009/2010       |
| FoxVa_15 | Quart            | Nus               | Neg.     | Female | Adult        | 2009/2010       |
| FoxVa_16 | Sarre            | Aosta             | Neg.     | Male   | Adult        | 2009/2010       |

|          |                       |                   |      |        |           |           |
|----------|-----------------------|-------------------|------|--------|-----------|-----------|
| FoxVa_17 | Torgnon               | Antey-Saint-André | Neg. | -      | -         | 2009/2010 |
| FoxVa_18 | Sarre                 | Aosta             | Neg. | Female | Adult     | 2009/2010 |
| FoxVa_19 | Gignod                | Etroubles         | Neg. | Male   | Adult     | 2009/2010 |
| FoxVa_20 | Gignod                | Etroubles         | Neg. | Female | Adult     | 2009/2010 |
| FoxVa_21 | Saint-Rhémy-En-Bosses | Etroubles         | Neg. | Male   | Adult     | 2009/2010 |
| FoxVa_22 | Morgex                | Morgex            | Neg. | Male   | Adult     | 2009/2010 |
| FoxVa_23 | Pont-Saint-Martin     | Pont-Saint Martin | Neg. | Male   | Adult     | 2009/2010 |
| FoxVa_24 | Bionaz                | Valpelline        | Neg. | Female | Adult     | 2009/2010 |
| FoxVa_25 | Arvier                | Arvier            | Neg. | Female | Adult     | 2009/2010 |
| FoxVa_26 | Quart                 | Nus               | Neg. | Male   | Adult     | 2009/2010 |
| FoxVa_27 | Nus                   | Nus               | Neg. | Male   | Adult     | 2009/2010 |
| FoxVa_28 | Torgnon               | Antey-Saint-André | Neg. | Female | Sub-adult | 2009/2010 |
| FoxVa_29 | La Salle              | Morgex            | Neg. | Female | Juvenile  | 2009/2010 |
| FoxVa_30 | Bionaz                | Valpelline        | Neg. | Female | Adult     | 2009/2010 |
| FoxVa_31 | Quart                 | Nus               | Neg. | Female | Adult     | 2009/2010 |
| FoxVa_32 | Antey-Saint-André     | Antey-Saint-André | Neg. | Male   | Adult     | 2009/2010 |
| FoxVa_33 | Courmayeur            | Pré-Saint-Didier  | Neg. | Female | Adult     | 2009/2010 |
| FoxVa_34 | Doues                 | Valpelline        | Neg. | Male   | Adult     | 2009/2010 |
| FoxVa_35 | Doues                 | Valpelline        | Neg. | Male   | Adult     | 2009/2010 |
| FoxVa_36 | Aosta                 | Aosta             | Neg. | Male   | Adult     | 2009/2010 |
| FoxVa_37 | Torgnon               | Antey-Saint-André | Neg. | Female | Adult     | 2009/2010 |
| FoxVa_38 | Valtournenche         | Antey-Saint-André | Neg. | Male   | Adult     | 2009/2010 |
| FoxVa_39 | Charvensod            | Aosta             | Neg. | Male   | Adult     | 2009/2010 |
| FoxVa_40 | Fenis                 | Nus               | Neg. | Female | Juvenile  | 2009/2010 |
| FoxVa_41 | Saint-Denis           | Chatillon         | Neg. | Female | Adult     | 2009/2010 |
| FoxVa_42 | Challand-Saint-Victor | Verres            | Neg. | Male   | Adult     | 2009/2010 |
| FoxVa_43 | Valgrisenche          | Arvier            | Neg. | Male   | Adult     | 2009/2010 |
| FoxVa_44 | Cogne                 | Aymavilles        | Neg. | Male   | Adult     | 2009/2010 |
| FoxVa_45 | Saint-Rhémy-En-Bosses | Etroubles         | Neg. | Male   | Adult     | 2009/2010 |
| FoxVa_46 | Quart                 | Nus               | Neg. | Female | Juvenile  | 2009/2010 |
| FoxVa_47 | Ayas                  | Brusson           | Neg. | Male   | Adult     | 2009/2010 |
| FoxVa_48 | Saint-Pierre          | Villeneuve        | Neg. | Female | Adult     | 2009/2010 |
| FoxVa_49 | Quart                 | Nus               | Neg. | Female | Adult     | 2009/2010 |
| FoxVa_50 | Avise                 | Arvier            | Neg. | Female | Adult     | 2009/2010 |
| FoxVa_51 | Saint-Pierre          | Villeneuve        | Neg. | Male   | Adult     | 2009/2010 |
| FoxVa_52 | Pré-Saint-Didier      | Pré-Saint-Didier  | Neg. | Male   | Adult     | 2009/2010 |

|          |                       |                           |      |        |           |            |
|----------|-----------------------|---------------------------|------|--------|-----------|------------|
| FoxVa_53 | Doues                 | Valpelline                | Neg. | Female | Adult     | 2009/2010  |
| FoxVa_54 | Torgnon               | Antey-Saint-André         | Neg. | Male   | Sub-adult | 2009/2010  |
| FoxVa_55 | Torgnon               | Antey-Saint-André         | Neg. | Female | Adult     | 2009/2010  |
| FoxVa_56 | Chatillon             | Chatillon                 | Neg. | Male   | Adult     | 2009/2010  |
| FoxVa_57 | Chatillon             | Chatillon                 | Neg. | Male   | Adult     | 2009/2010  |
| FoxVa_58 | Nus                   | Nus                       | Neg. | Male   | Adult     | 2009/2010  |
| FoxVa_59 | La Magdeleine         | Antey-Saint-André         | Neg. | Male   | Adult     | 2009/2010  |
| FoxVa_60 | Brissogne             | Nus                       | Neg. | Male   | Adult     | 2009/2010  |
| FoxVa_61 | La Thuile             | Pré-Saint-Didier          | Pos. | Male   | Adult     | 2009/2010  |
| FoxVa_62 | Cogne                 | Aymavilles                | Neg. | Male   | Adult     | 2009/2010  |
| FoxVa_63 | Saint-Rhémy-En-Bosses | Etroubles                 | Neg. | Female | Adult     | 2009/2010  |
| FoxVa_64 | Pollein               | Aosta                     | Neg. | Male   | Adult     | 2009/2010  |
| FoxVa_65 | Brissogne             | Nus                       | Neg. | Male   | Adult     | 2009/2010  |
| FoxVa_66 | Sarre                 | Aosta                     | Neg. | Male   | Adult     | 2009/2010  |
| FoxVa_67 | Nus                   | Nus                       | Neg. | Male   | Adult     | 2009/2010  |
| FoxVa_68 | Valtournenche         | Antey-Saint-André         | Neg. | Female | Adult     | 2009/2010  |
| FoxVa_69 | Aosta                 | Aosta                     | Neg. | Female | Adult     | 2009/2010  |
| FoxVa_70 | Saint Marcel          | Nus                       | Neg. | Female | Adult     | 2009/2010  |
| FoxVe_1  | Cortina D'ampezzo     | Pezie                     | Neg. | Male   | Adult     | 15/09/2017 |
| FoxVe_2  | Lorenzago Di Cadore   | Pezze Lorenzago Di Cadore | Neg. | Male   | Adult     | 17/09/2017 |
| FoxVe_3  | Lorenzago Di Cadore   | Pezze Lorenzago Di Cadore | Neg. | Female | Adult     | 17/09/2017 |
| FoxVe_4  | Longarone             | Igne                      | Neg. | -      | Juvenile  | 17/09/2017 |
| FoxVe_5  | Tambre                | Pian Canton               | Neg. | Male   | -         | 24/09/2017 |
| FoxVe_6  | Tambre                | Rispen                    | Neg. | Male   | -         | 23/09/2017 |
| FoxVe_7  | Pieve D'alpago        | Campedel                  | Neg. | -      | -         | 20/09/2017 |
| FoxVe_8  | Tambre                | Federa                    | Neg. | -      | -         | 20/09/2017 |
| FoxVe_9  | Chies D'alpago        | Comune Di Chies D'alpago  | Neg. | Female | Adult     | 20/09/2017 |
| FoxVe_10 | Chies D'alpago        | Irrighe                   | Neg. | Male   | Adult     | 29/09/2017 |
| FoxVe_11 | Tambre                | Col Indes                 | Neg. | Male   | Adult     | 28/09/2017 |
| FoxVe_12 | Tambre                | Pian Canton               | Neg. | Female | Juvenile  | 29/09/2017 |
| FoxVe_13 | Pieve Di Cadore       | Nonciadize                | Neg. | Male   | Adult     | 20/09/2017 |
| FoxVe_14 | Alpago                | Foran                     | Neg. | Male   | -         | 04/10/2017 |
| FoxVe_15 | Tambre                | Ciprian                   | Neg. | Female | -         | 04/10/2017 |
| FoxVe_16 | Tambre                | Pian Canton               | Neg. | Female | -         | 04/10/2017 |
| FoxVe_17 | Tambre                | Pianon                    | Neg. | Female | -         | 02/10/2017 |
| FoxVe_18 | Biban                 | Biban                     | Neg. | Male   | -         | 02/10/2017 |

|          |                       |                        |      |        |           |            |
|----------|-----------------------|------------------------|------|--------|-----------|------------|
| FoxVe_19 | Ponte Nelle Alpi      | Soccher                | Neg. | Male   | -         | 11/10/2017 |
| FoxVe_20 | Tambre                | Sant'anna              | Neg. | Male   | -         | 15/10/2017 |
| FoxVe_21 | Tambre                | Sant'anna              | Neg. | Female | Juvenile  | 22/10/2017 |
| FoxVe_22 | Tambre                | Col Indes              | Neg. | Female | Juvenile  | 22/10/2017 |
| FoxVe_23 | Medei                 | Medei                  | Neg. | Male   | Juvenile  | 28/10/2017 |
| FoxVe_24 | Pieve Di Cadore       | Nonciarize             | Neg. | Female | Adult     | 07/10/2017 |
| FoxVe_25 | Tambre                | Pian D'ort             | Neg. | Female | Adult     | 29/10/2017 |
| FoxVe_26 | Tambre                | Ciprian                | Neg. | Female | Adult     | 01/11/2017 |
| FoxVe_27 | Pieve Di Cadore       | Col Pian               | Neg. | -      | Juvenile  | 18/11/2017 |
| FoxVe_28 | Belluno               | Secchi                 | Neg. | Male   | Adult     | 09/12/2017 |
| FoxVe_29 | Sedico                | Suppiei                | Neg. | Male   | Adult     | 09/12/2017 |
| FoxVe_30 | Sedico                | Peron                  | Neg. | Male   | Adult     | 06/12/2017 |
| FoxVe_31 | Sedico                | Suppiei                | Neg. | Female | Adult     | 09/12/2017 |
| FoxVe_32 | Sedico                | Suppiei                | Neg. | Male   | Adult     | 09/12/2017 |
| FoxVe_33 | Belluno               | Fiume Piave            | Neg. | Male   | Adult     | 10/12/2017 |
| FoxVe_34 | Tambre                | Malolt                 | Neg. | -      | Juvenile  | 06/11/2017 |
| FoxVe_35 | Tambra                | Pian Delle Lastre      | Neg. | -      | Juvenile  | 06/12/2017 |
| FoxVe_36 | Pieve Di Cadore       | Nebbiu'                | Neg. | Female | Adult     | 27/11/2017 |
| FoxVe_37 | Trichiana             | S.Antonio Di Tortal    | Neg. | Female | Adult     | 13/12/2017 |
| FoxVe_38 | Trichiana             | S.Antonio Di Tortal    | Neg. | -      | Juvenile  | 13/12/2017 |
| FoxVe_39 | Sedico                | Longano                | Neg. | Male   | Adult     | 14/12/2017 |
| FoxVe_40 | Sedico                | Longano                | Neg. | Male   | Adult     | 10/12/2017 |
| FoxVe_41 | Croda Rossa Belluno   | Croda Rossa Nevegal    | Neg. | -      | Juvenile  | 17/12/2017 |
| FoxVe_42 | Tambre                | Col Indes              | Neg. | Male   | Adult     | 20/12/2017 |
| FoxVe_43 | Comelico Superiore Bl | Dosoleso               | Neg. | Male   | Adult     | 18/03/2017 |
| FoxVe_44 | Comelico Superiore Bl | Dosoleso               | Pos. | Male   | Adult     | 06/02/2017 |
| FoxVe_45 | Santa Giustina        | Formegan               | Neg. | -      | Adult     | 28/01/2017 |
| FoxVe_46 | Pedavena              | Pedavena               | Neg. | -      | -         | 14/04/2017 |
| FoxVe_47 | Ponte Nelle Alpi      | Col Cugnan             | Neg. | Female | Adult     | 29/04/2017 |
| FoxVe_48 | Feltre                |                        | Neg. | -      | Juvenile  | 04/06/2017 |
| FoxVe_49 | Pescul                | <u>Selva Di Cadore</u> | Neg. | Female | Adult     | 16/05/2017 |
| FoxVe_50 | Cornei                | Alpago                 | Neg. | Female | Adult     | 02/12/2017 |
| FoxVe_51 | Punta                 | Val Di Zoldo           | Neg. | Female | Adult     | 23/10/2017 |
| FoxVe_52 | Le Fosse              | Peron                  | Neg. | Female | Adult     | 06/12/2017 |
| FoxVe_53 | Curva Del Cristo      | Belluno                | Neg. | Female | Adult     | 17/01/2018 |
| FoxVe_54 | Valzella              |                        | Neg. | Female | Sub-adult | 31/01/2018 |

|          |                      |                        |      |        |          |            |
|----------|----------------------|------------------------|------|--------|----------|------------|
| FoxVe_55 | Alpago               | Valde                  | Neg. | Female | Adult    | 21/01/2018 |
| FoxVe_56 | Tambre               | Malolt                 | Neg. | Female | Adult    | 14/01/2018 |
| FoxVe_57 | Tambre               | Franamento Valturca Na | Neg. | Female | Adult    | 21/01/2018 |
| FoxVe_58 | Alpago               | Tomas                  | Neg. | Female | Adult    | 21/01/2018 |
| FoxVe_59 | Farra D'alpago       | Tomas                  | Neg. | Female | Adult    | 21/01/2018 |
| FoxVe_60 | Belluno              | Antore                 | Neg. | Male   | Adult    | 25/01/2018 |
| FoxVe_61 | Tambre               | Pian Grant             | Neg. | Male   | Juvenile | 24/09/2018 |
| FoxVe_62 | Puos D'alpago        | Romascienz             | Neg. | Male   | Adult    | 25/01/2018 |
| FoxVe_63 | Puos D'alpago        | Malolt                 | Neg. | Male   | Adult    | 28/01/2018 |
| FoxVe_64 | Puos D'alpago        | Malolt                 | Neg. | Male   | Adult    | 28/01/2018 |
| FoxVe_65 | Puos D'alpago        | Malolt                 | Neg. | Female | Adult    | 28/01/2018 |
| FoxVe_66 | Colle Santa Lucia    | Passo Giau             | Pos. | Male   | Adult    | 08/10/2018 |
| FoxVe_67 | Belluno              | Visome                 | Pos. | Male   | Adult    | 04/01/2018 |
| FoxVe_68 | Belluno              | Visome                 | Pos. | Female | Adult    | 04/01/2018 |
| FoxVe_69 | Belluno              | Visome                 | Neg. | Female | Adult    | 04/01/2018 |
| FoxVe_70 | Cesiomaggiore        | Calliol                | Neg. | Female | Adult    | 11/10/2018 |
| FoxVe_71 | Lentiai              | San Gervasio           | Neg. | Female | Juvenile | 01/11/2018 |
| FoxVe_72 | Comelico Superiore   | Selvapiana             | Neg. | Male   | Adult    | 21/10/2018 |
| FoxVe_73 | Tambre               | Federa                 | Neg. | Male   | Adult    | 17/11/2018 |
| FoxVe_74 | Tambre               | Pianon                 | Neg. | Male   | Adult    | 23/11/2018 |
| FoxVe_75 | Comelico Superiore   | Pista Pies             | Neg. | Male   | Adult    | 30/01/2018 |
| FoxVe_76 | Domegge Di Cadore    | Ranzenigo              | Neg. | Male   | Adult    | 17/11/2018 |
| FoxVe_77 | Lentiai              | Salet Di Sotto         | Neg. | Male   | Adult    | 16/12/2018 |
| FoxVe_78 | Cencenighe Agordino  | Malos                  | Neg. | Male   | Adult    | 14/12/2018 |
| FoxVe_79 | Comelico Superiore   | Pian Formaggio         | Neg. | Male   | Adult    | 12/12/2018 |
| FoxVe_80 | Tambre               | Federa                 | Neg. | Male   | Adult    | 15/12/2018 |
| FoxVe_81 | Alpago               | Poiatte                | Neg. | Female | Adult    | 31/01/2018 |
| FoxVe_82 | Puos D'alpago        | Le Rive                | Neg. | Female | Adult    | 09/02/2018 |
| FoxVe_83 | Puos D'alpago        | Le Rive                | Neg. | Female | Adult    | 31/01/2018 |
| FoxVe_84 | Cavessago            | Cavessago              | Neg. | Female | Adult    | 01/03/2018 |
| FoxVe_85 | Belluno              | Cirvoi                 | Neg. | Male   | Adult    | 30/12/2017 |
| FoxVe_86 | Farra D'alpago       | Coste                  | Neg. | Male   | Adult    | 31/12/2017 |
| FoxVe_87 | Tambre 32010         | Sant'anna              | Neg. | Female | Adult    | 31/12/2017 |
| FoxVe_88 | Tambre               | Manteo                 | Neg. | Male   | Adult    | 03/01/2018 |
| FoxVe_89 | San Pietro In Campo  | San Pietro In Campo    | Neg. | Male   | Adult    | 30/12/2017 |
| FoxVe_90 | San Pietro Di Cadore | San Pietro Di Cadore   | Neg. | Male   | Adult    | 23/12/2017 |

|                  |                              |                          |      |        |           |            |
|------------------|------------------------------|--------------------------|------|--------|-----------|------------|
| <b>FoxVe_91</b>  | San Pietro Di Cadore         | Schiaron                 | Neg. | Male   | Adult     | 23/12/2017 |
| <b>FoxVe_92</b>  | San Pietro Di Cadore         | Via Pier Fortunato Calvi | Neg. | Male   | Adult     | 20/09/2017 |
| <b>FoxVe_93</b>  | Cesiomaggiore                | Bordugo                  | Neg. | Male   | Adult     | 20/09/2017 |
| <b>FoxVe_94</b>  | Livinallongo Del Col Di Lana | Varda                    | Neg. | Male   | Adult     | 06/04/2018 |
| <b>FoxVe_95</b>  | Fonzaso                      | Ai Giaroni               | Pos. | Male   | Adult     | 14/01/2018 |
| <b>FoxVe_96</b>  | Tambre                       | Sant'anna                | Neg. | Male   | Adult     | 13/01/2018 |
| <b>FoxVe_97</b>  | Alpago                       | Spert                    | Neg. | Male   | Adult     | 14/01/2018 |
| <b>FoxVe_98</b>  | Alpago                       | Spert                    | Neg. | Female | Adult     | 14/01/2018 |
| <b>FoxVe_99</b>  | Farra D'alpago               | Poiatte                  | Neg. | Male   | Adult     | 23/12/2017 |
| <b>FoxVe_100</b> | Farra D'alpago               | Coste                    | Neg. | Male   | Adult     | 23/12/2017 |
| <b>FoxVe_101</b> | Tomas                        | Farra D'alpago           | Neg. | Male   | Adult     | 07/12/2019 |
| <b>FoxVe_102</b> | Poiatte                      | Alpago                   | Neg. | Female | Adult     | 07/12/2019 |
| <b>FoxVe_103</b> | Spert                        | Alpago                   | Neg. | Female | Sub-adult | 26/01/2020 |
| <b>FoxVe_104</b> | Valmaor                      | Chies D'alpago           | Neg. | Male   | Adult     | 26/01/2020 |
| <b>FoxVe_105</b> | San Daniele                  | Chies D'alpago           | Neg. | Male   | Adult     | 26/01/2020 |
| <b>FoxVe_106</b> | Val Maor                     | Chies D'alpago           | Neg. | Male   | Adult     | 26/01/2020 |
| <b>FoxVe_107</b> | Le Ronche                    | La Valle Agordina        | Neg. | Female | Juvenile  | 29/05/2020 |
| <b>FoxVe_108</b> | Rufane                       | Puos D'alpago            | Neg. | Male   | Sub-adult | 26/01/2020 |
| <b>FoxVe_109</b> | Poiatte                      | Alpago                   | Neg. | Female | Sub-adult | 19/01/2020 |
| <b>FoxVe_110</b> | Tomas                        | Farra D'alpago           | Neg. | Female | Adult     | 12/01/2020 |
| <b>FoxVe_111</b> | Prese                        | Alpago                   | Neg. | Male   | Adult     | 12/01/2020 |
| <b>FoxVe_112</b> | Col Indes                    | Tambre                   | Neg. | Female | Adult     | 05/01/2020 |
| <b>FoxVe_113</b> | Foran                        | Alpago                   | Neg. | Male   | Adult     | 05/01/2020 |
| <b>FoxVe_114</b> | Pianture                     | Farra D'alpago           | Neg. | Male   | Adult     | 05/01/2020 |
| <b>FoxVe_115</b> | Col Indes                    | Tambre                   | Neg. | Female | Adult     | 17/10/2020 |
