# Supplementary figures and images for: Canine Circovirus in Foxes from Northern Italy: Where Did It All Begin?
Source: MDPI journal article supplement (doi:10.3390/pathogens10081002), 2021-08-09

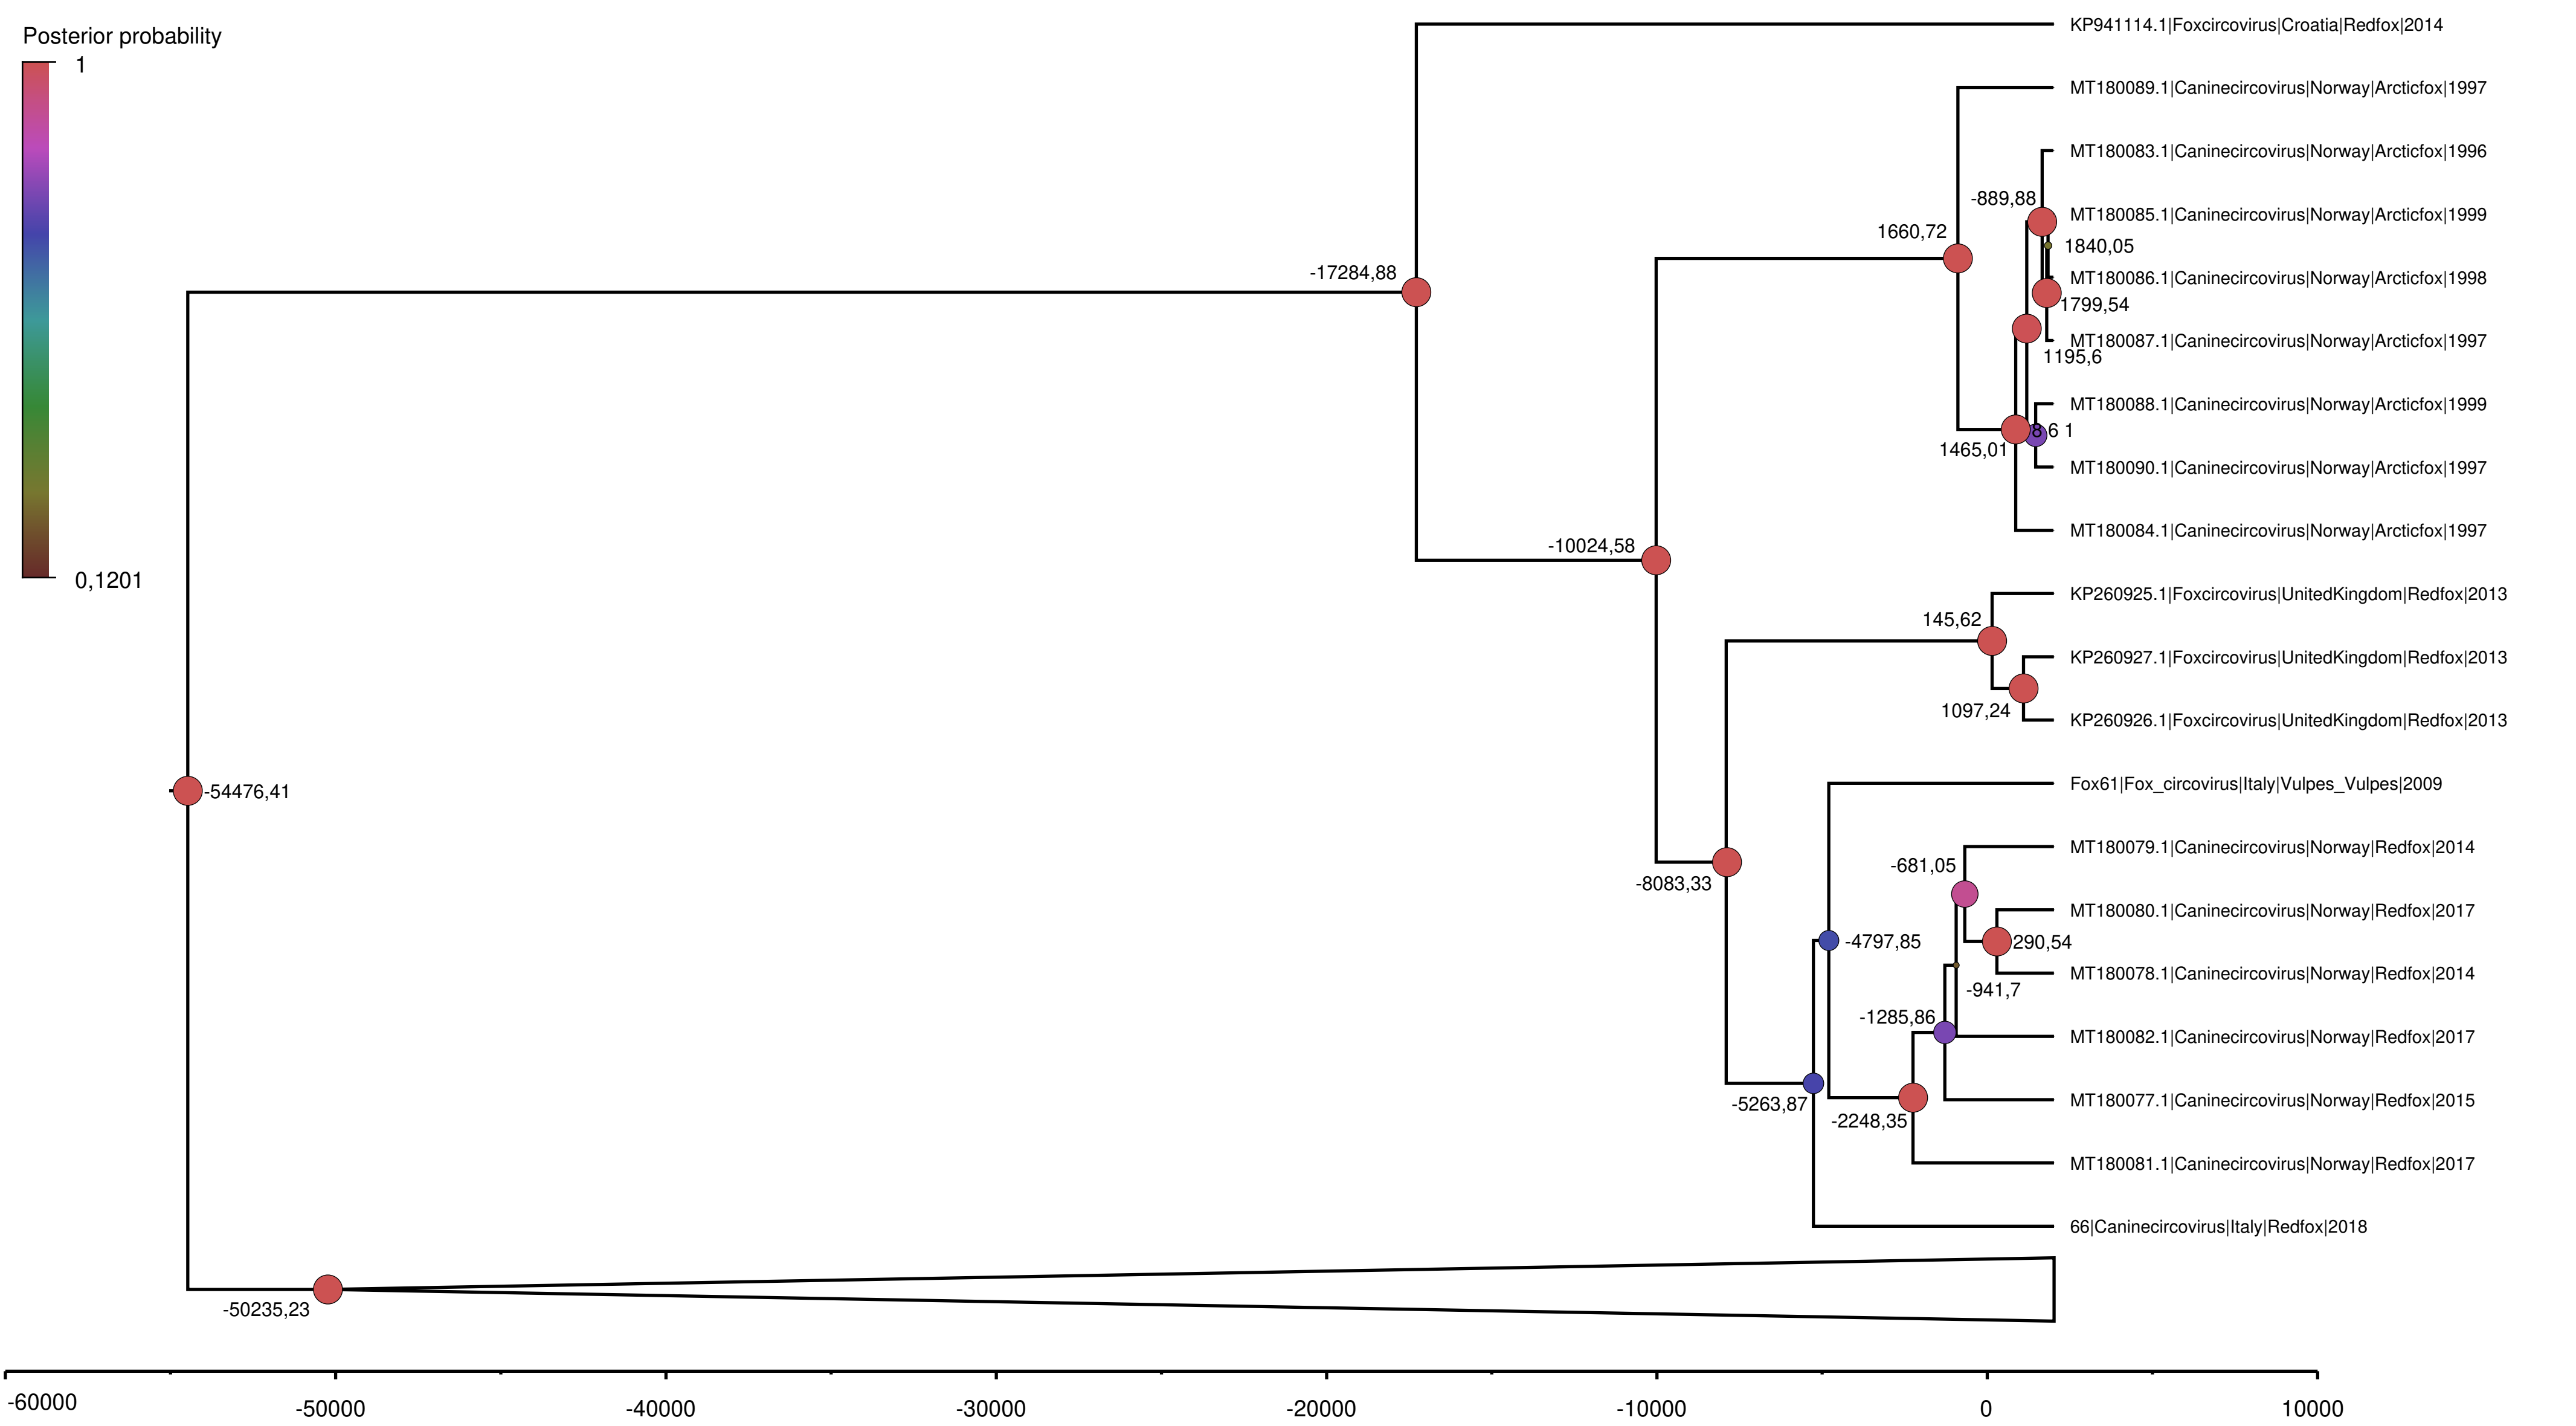

Supplement: s1 [file s1]
